# Supplementary material for: Polymorphisms within autophagy‐related genes as susceptibility biomarkers for pancreatic cancer: A meta‐analysis of three large European cohorts and functional characterization
Source: PubMed Central journal article supplement — Int J Cancer. 2024 Sep 25;156(2):339–52. doi: 10.1002/ijc.35196 (PMC11578083; doi:10.1002/ijc.35196), 2024-09-25
Supplement: IJC-156-339-s003.pdf [file IJC-156-339-s003.pdf]

# **Polymorphisms within autophagy-related genes as susceptibility biomarkers for pancreatic cancer: a meta-analysis of three large European cohorts and functional characterization**

Fernando Gálvez-Montosa, Giulia Peduzzi, José M. Sanchez-Maldonado, Rob Ter Horst, Antonio J. Cabrera-Serrano, Manuel Gentiluomo, Angelica Macaudo, Natalia Luque, Pelin Ünal, Francisco J. García-Verdejo, Yang Li, José A. López López, Angelika Stein, Bas Bueno-de-Mesquita, Paolo G. Arcidiacono, Dalila L. Zanette, Christoph Kahlert, Francesco Perri, Pavel Soucek, Renata Talar-Wojnarowska, George Theodoropoulos, Jakob R. Izbicki, Hussein Tamás, Hanneke van Laarhoven, Gennaro Nappo, Maria C. Petrone, Martin Lovecek, Roel C.H. Vermeulen, Kestutis Adamonis, Fernando J. Reyes-Zurita, Bernd Hollecsek, Jolanta Sumskiene, Beatrice Mohelníková-Duchoňová, Rita T. Lawlor, Raffaele Pezzilli, Mateus N. Aoki, Claudio Pasquali, Vitalija Petrenkiene, Daniela Basso, Stefania Bunduc, Annalisa Comandatore, Hermann Brenner, Stefano Ermini, Giuseppe Vanella, Mara R. Goetz, Livia Archibugi, Maurizio Lucchesi, Faik G. Uzunoglu, Olivier Busch, Anna C. Milanetto, Marta Puzzono, Juozas Kupcinskas, Luca Morelli, Cosimo Sperti, Silvia Carrara, Gabriele Capurso, Casper H. J. van Eijck, Martin Oliverius, Susanne Roth, Francesca Tavano, Rudolf Kaaks, Andrea Szentesi, Ludmila Vodickova, Claudio Luchini, Ben Schöttker, Stefano Landi, Orsolya Dohan, Matteo Tacelli, William Greenhalf, Maria Gazouli, John P. Neoptolemos, Giulia M. Cavestro, Ugo Boggi, Anna Latiano, Péter Hegyi, Laura Ginocchi, Mihai G. Netea, Pedro Sánchez-Rovira, Federico Canzian, Daniele Campa, Juan Sainz

## **SUPPLEMENTARY MATERIAL**

### **TABLE OF CONTENTS**

- 1. Genotyping technology and quality control of genotyping.**
- 2. Imputation and quality controls of imputation.**
- 3. PANDoRA ethnic composition.**
- 4. Supplementary Table 1 (uploaded as separated Excel file due to its large size).**
- 5. Supplementary Table 2 (uploaded as separated Excel file due to its large size).**
- 6. Supplementary Table 3.**
- 7. Supplementary Table 4.**
- 8. References.**

## ***1. Genotyping technology and quality control of genotyping***

DNA of PANDoRA samples was isolated from whole blood using QIAamp DNA extraction kit (Qiagen, California, USA) and distributed in 384-well plates for genotyping. For quality control, 8% of the samples were randomly replicated throughout the plates, and no-template controls were included in each plate. Genotyping was performed using KASP assay. A QuantStudio 5 instrument and QuantStudio software (Applied Biosystems) were used to detect the genotypes. After genotyping, deviation from HWE distribution was assessed in controls, considering the overall population and dividing by the country of origin of the samples.

## ***2. Imputation and quality controls of imputation***

The genotypes of PDAC cases and controls were downloaded from the database of Genotypes and Phenotypes (dbGaP; study accession nos. phs000206.v5.p3 and phs000648.v1.p1; project reference no. 12644). Genotyping procedures, quality control and data collection details of these studies have been previously described in the original publications[1-4]. After downloading the datasets, we carried out quality controls (QCs) and imputation. The QCs were performed prior to the imputation and included: removal of individuals with gender mismatches, call rate < 0.98, minimal or excessive heterozygosity (> 3 SDs from the mean) or cryptic relatedness (PI\_HAT > 0.2) and exclusion of SNPs with minor allele frequency (MAF) < 0.01, call rate < 0.98 or evidence for violations of HWE ( $p < 1 \times 10^{-6}$ ). The genotypes were phased using SHAPEIT v2 software and the imputation was performed, separately for each dataset, using the Michigan Imputation Server (<https://imputationserver.sph.umich.edu>), and the Haplotype Reference Consortium (HRC) as reference, and merged using PLINK 2.0 software<sup>51</sup>. Afterwards the SNPs with completion rate and call-rate < 98%, a minor allele frequency (MAF) < 0.01, evidence for violations of HWE ( $p < 1 \times 10^{-5}$ )

and low-quality imputation score (INFO score < 0.7) were discarded, leaving 7,509,345 SNPs in the final dataset.

### ***3. PANDoRA ethnic composition***

The PANDoRA consortium has been extensively described elsewhere[5]. Briefly, it consists of a multicentric study conducted in 10 European countries (Italy, Greece, Germany, Netherlands, Denmark, Czech Republic, Hungary, Poland, Lithuania and United Kingdom), and Brazil. Cases had a confirmed diagnosis of PDAC and data on age at diagnosis, sex and country of origin was retrospectively collected for each patient. Controls were selected from blood donors, the general population and hospitalised subjects without oncological diseases. In addition to PANDoRA subjects, the genotypes of British and Dutch controls from the European Prospective Investigation into Cancer and Nutrition (EPIC)[6, 7], a prospective cohort study with 519,978 participants (aged 35–70 years) from ten European countries, and German controls from Epidemiologische Studie zu Chancen der Verhütung, Früherkennung und optimierten THERapie chronischer ERkrankungen in der älteren Bevölkerung (ESTHER)[8], a cohort study that includes 9,961 German people aged between 50 and 74 years, were included.

***4. Supplementary Table 1 (uploaded as separated Excel file due to its large size).***

***5. Supplementary Table 2 (uploaded as separated Excel file due to its large size).***

6. Supplementary Table 3.

**Supplementary Table 3.** Cell types analysed either in whole blood or peripheral mononuclear blood cells.

| Number | Name                                    | Parent  | Grandparent |
|--------|-----------------------------------------|---------|-------------|
| 1      | Leukocytes_CD45P_LMI1                   | None    | None        |
| 2      | Neutrophils_LMI1                        | 1       | None        |
| 3      | Monocytes_CD14P_LMI1                    | 1       | None        |
| 4      | Classical_monocytes_CD14PPCD16N_LMI1    | 3       | 1           |
| 5      | Intermediate_monocytes_CD14PPCD16P_LMI1 | 3       | 1           |
| 6      | NonClassical_monocytes_CD14PCD16P_LMI1  | 3       | 1           |
| 7      | Lymphocytes_LMI1                        | 1       | None        |
| 8      | T_cells_CD3P_CD56N_LMI1                 | 7       | 1           |
| 9      | NK_cells_CD3N_CD56P_LMI1                | 7       | 1           |
| 10     | NKT_cells_CD3P_CD56P_LMI1               | 7       | 1           |
| 11     | B_cells_CD19P_LMI1                      | 7       | 1           |
| 12     | CD4P_T_cells_LMI1                       | 8       | 7           |
| 13     | CD8P_T_cells_LMI1                       | 8       | 7           |
| 14     | DP_CD4P_CD8P_LMI1                       | 8       | 7           |
| 15     | DN_CD4N_CD8N_LMI1                       | 8       | 7           |
| 16     | CD4P_CD25high_Treg_LMI1                 | 12      | 8           |
| 17     | NK_dim_CD56P_CD16P_LMI1                 | 9       | 7           |
| 18     | NK_bright_CD56PP_CD16N_LMI1             | 9       | 7           |
| 19     | NK_CD56P_CD16N_LMI1                     | 9       | 7           |
| 20     | Leukocytes_CD45P_LMI2                   | justRef | justRef     |
| 21     | T_cells_CD3P_CD56N_LMI2                 | justRef | justRef     |
| 22     | CD4P_T_cells_LMI2                       | justRef | justRef     |
| 23     | CD8P_T_cells_LMI2                       | justRef | justRef     |
| 24     | CD45RON_CD45RAP_T_cells_LMI2            | 21      | 20          |
| 25     | CD45ROP_CD45RAP_T_cells_LMI2            | 21      | 20          |
| 26     | CD45ROP_CD45RAN_T_cells_LMI2            | 21      | 20          |
| 27     | CD45RON_CD45RAN_T_cells_LMI2            | 21      | 20          |
| 28     | CD4P_CD25P_CD127low_Treg_LMI2           | 22      | 21          |
| 29     | CD4P_Naive_CD45RAP_CD27P_LMI2           | 22      | 21          |
| 30     | CD4P_Eff_CD45RAP_CD27N_LMI2             | 22      | 21          |
| 31     | CD4P_EM_CD45RAN_CD27N_LMI2              | 22      | 21          |
| 32     | CD4P_CM_CD45RAN_CD27P_LMI2              | 22      | 21          |
| 33     | CD4P_Naive_CD45RON_CD27P_LMI2           | 22      | 21          |
| 34     | CD4P_Eff_CD45RON_CD27N_LMI2             | 22      | 21          |
| 35     | CD4P_EM_CD45ROP_CD27N_LMI2              | 22      | 21          |
| 36     | CD4P_CM_CD45ROP_CD27P_LMI2              | 22      | 21          |
| 37     | CD8P_Naive_CD45RAP_CD27P_LMI2           | 23      | 21          |
| 38     | CD8P_Eff_CD45RAP_CD27N_LMI2             | 23      | 21          |
| 39     | CD8P_EM_CD45RAN_CD27N_LMI2              | 23      | 21          |
| 40     | CD8P_CM_CD45RAN_CD27P_LMI2              | 23      | 21          |

|                                                       |         |         |
|-------------------------------------------------------|---------|---------|
| 41 CD8P_Naive_CD45RON_CD27P_LMI2                      | 23      | 21      |
| 42 CD8P_Eff_CD45RON_CD27N_LMI2                        | 23      | 21      |
| 43 CD8P_EM_CD45ROP_CD27N_LMI2                         | 23      | 21      |
| 44 CD8P_CM_CD45ROP_CD27P_LMI2                         | 23      | 21      |
| 45 Lymphocytes_LMI3                                   | justRef | justRef |
| 46 B_cells_CD3N_CD19P_LMI3                            | justRef | justRef |
| 47 CD27N_IgMP_LMI3                                    | justRef | justRef |
| 48 CD19P_CD20N_Plasma_blasts_LMI3                     | 47      | 46      |
| 49 CD19P_CD20P_B_cells_LMI3                           | 47      | 46      |
| 50 IgDN_CD5PP_LMI3                                    | 47      | 46      |
| 51 IgDP_CD5PP_LMI3                                    | 47      | 46      |
| 52 IgDN_CD5P_LMI3                                     | 47      | 46      |
| 53 IgDP_CD5P_LMI3                                     | 47      | 46      |
| 54 CD24P_CD38P_LMI3                                   | 47      | 46      |
| 55 Transitional_B_cells_CD24PP_CD38PP_LMI3            | 47      | 46      |
| 56 IgDN_IgMP_LMI3                                     | 47      | 46      |
| 57 IgDP_IgMP_LMI3                                     | 47      | 46      |
| 58 IgDP_IgMN_LMI3                                     | 47      | 46      |
| 59 IgDN_IgMN_LMI3                                     | 47      | 46      |
| 60 Transitional_B_cell_CD27N_IgMP_CD24P_CD38high_LMI3 | 48      | 47      |
| 61 Mature_naive_CD24P_CD38P_LMI3                      | 48      | 47      |
| 62 IgMN_LMI3                                          | 55      | 47      |
| 63 CD24P_CD38P_CD27P_IgMP_LMI3                        | 55      | 47      |
| 64 Natural_effector_CD24P_CD38P_IgDP_IgMP_LMI3        | 55      | 47      |
| 65 Plasmablast_IgDN_IgMN_CD38PP_LMI3                  | 60      | 47      |
| 66 Class_switched_memory_IgDN_IgMN_CD38P_CD27P_LMI3   | 60      | 47      |
| 67 IgDN_IgMN_CD27N_LMI3                               | 60      | 47      |
| 68 Naive_B_cells_IgDP_IgMP_CD27N_LMI3                 | 58      | 47      |
| 69 Memory_B_cells_IgDP_IgMP_CD27P_LMI3                | 58      | 47      |
| 70 IgDN_IgMP_CD27N_LMI3                               | 57      | 47      |
| 71 IgM_only_memory_IgDN_IgMP_CD27_LMI3                | 57      | 47      |
| 72 IgMP_CD38PP_CD27P_LMI3                             | 57+58   | 47      |
| 73 Class_non_switched_memory_IgMP_CD38P_CD27P_LMI3    | 57+58   | 47      |
| 74 IgMP_CD27N_LMI3                                    | 57+58   | 47      |
| 75 Lymphocytes_PBMC_LMI4                              | justRef | justRef |
| 76 CD4P_T_cells_PBMC_LMI4                             | justRef | justRef |
| 77 DP_CD4P_CD8P_PBMC_LMI4                             | justRef | justRef |
| 78 DN_CD4N_CD8N_PBMC_LMI4                             | justRef | justRef |
| 79 CD8P_T_cells_PBMC_LMI4                             | justRef | justRef |
| 80 CD25N_CD127P_Tconv_PBMC_LMI4                       | justRef | justRef |
| 81 CD4P_CD25P_CD127low_Treg_PBMC_LMI4                 | justRef | justRef |
| 82 Prol_DN_CD4NCD8N_PBMC_LMI4                         | 80      | 77      |
| 83 Prol_DP_CD4PCD8P_PBMC_LMI4                         | 79      | 77      |
| 84 Prol_CD4P_Tconv_PBMC_LMI4                          | 82      | 78      |
| 85 Prol_CD4P_Treg_PBMC_LMI4                           | 83      | 78      |

|                                  |    |    |
|----------------------------------|----|----|
| 86 Prol_CD8_PBMC_LMI4            | 81 | 77 |
| 87 Treg_FOXP3P_HeliosP_PBMC_LMI4 | 83 | 78 |
| 88 Treg_FOXP3P_HeliosN_PBMC_LMI4 | 83 | 78 |
| 89 Treg_CD45RAP_PBMC_LMI4        | 83 | 78 |
| 90 Treg_CD45RAN_PBMC_LMI4        | 83 | 78 |
| 91 Treg_HLANDRP_PBMC_LMI4        | 83 | 78 |

**NOTE:** Cells included in LMI1-3 were measured in whole blood and those included LIM4 in PBMCs.

7. Supplementary Table 4.

**Supplementary Table 4.** Serum and plasma metabolites measured in the HFGP cohort.

| Serum_markers |                                      |            |       | Plasma_markers |                       |       |
|---------------|--------------------------------------|------------|-------|----------------|-----------------------|-------|
| Panel         | Assay                                | Uniprot ID | Units | OlinkID        | Assay                 | Units |
|               | Olink INFLAMMATION(v.3021 4E-BP1     | Q13541     |       | OID00536       | hsCRP                 | ug/mL |
|               | Olink INFLAMMATION(v.3021 ADA        | P00813     |       | OID00560       | IL18bpx               | pg/mL |
|               | Olink INFLAMMATION(v.3021 ARTN       | Q5T4W7     |       | OID00526       | Resistin              | ng/mL |
|               | Olink INFLAMMATION(v.3021 AXIN1      | O15169     |       | OID00487       | Leptin                | ng/mL |
|               | Olink INFLAMMATION(v.3021 Beta-NGF   | P01138     |       | OID00519       | Adiponectin           | ug/mL |
|               | Olink INFLAMMATION(v.3021 CASP-8     | Q14790     |       | OID00550       | AAT                   | mg/mL |
|               | Olink INFLAMMATION(v.3021 CCL11      | P51671     |       | OID00505       | IL-1Ra_Q (Quantikine) | pg/mL |
|               | Olink INFLAMMATION(v.3021 CCL19      | Q99731     |       | OID00513       | IL18                  | pg/mL |
|               | Olink INFLAMMATION(v.3021 CCL20      | P78556     |       | OID00556       | IL-1b                 | pg/mL |
|               | Olink INFLAMMATION(v.3021 CCL23      | P55773     |       | OID00530       | IL-6                  | pg/mL |
|               | Olink INFLAMMATION(v.3021 CCL25      | O15444     |       | OID00551       | VEGF-A                | pg/mL |
|               | Olink INFLAMMATION(v.3021 CCL28      | Q9NRJ3     |       | OID00539       |                       |       |
|               | Olink INFLAMMATION(v.3021 CCL3       | P10147     |       | OID00532       |                       |       |
|               | Olink INFLAMMATION(v.3021 CCL4       | P13236     |       | OID00498       |                       |       |
|               | Olink INFLAMMATION(v.3021 CD244      | Q9BZW8     |       | OID00477       |                       |       |
|               | Olink INFLAMMATION(v.3021 CD40       | P25942     |       | OID00542       |                       |       |
|               | Olink INFLAMMATION(v.3021 CD5        | P06127     |       | OID00531       |                       |       |
|               | Olink INFLAMMATION(v.3021 CD6        | P30203     |       | OID00499       |                       |       |
|               | Olink INFLAMMATION(v.3021 CD8A       | P01732     |       | OID05124       |                       |       |
|               | Olink INFLAMMATION(v.3021 CDCP1      | Q9H5V8     |       | OID00476       |                       |       |
|               | Olink INFLAMMATION(v.3021 CSF-1      | P09603     |       | OID00562       |                       |       |
|               | Olink INFLAMMATION(v.3021 CST5       | P28325     |       | OID00491       |                       |       |
|               | Olink INFLAMMATION(v.3021 CX3CL1     | P78423     |       | OID00552       |                       |       |
|               | Olink INFLAMMATION(v.3021 CXCL1      | P09341     |       | OID00496       |                       |       |
|               | Olink INFLAMMATION(v.3021 CXCL10     | P02778     |       | OID00535       |                       |       |
|               | Olink INFLAMMATION(v.3021 CXCL11     | O14625     |       | OID00486       |                       |       |
|               | Olink INFLAMMATION(v.3021 CXCL5      | P42830     |       | OID00520       |                       |       |
|               | Olink INFLAMMATION(v.3021 CXCL6      | P80162     |       | OID00534       |                       |       |
|               | Olink INFLAMMATION(v.3021 CXCL9      | Q07325     |       | OID00490       |                       |       |
|               | Olink INFLAMMATION(v.3021 DNER       | Q8NFT8     |       | OID01213       |                       |       |
|               | Olink INFLAMMATION(v.3021 EN-RAGE    | P80511     |       | OID00541       |                       |       |
|               | Olink INFLAMMATION(v.3021 FGF-19     | O95750     |       | OID00545       |                       |       |
|               | Olink INFLAMMATION(v.3021 FGF-21     | Q9NSA1     |       | OID00512       |                       |       |
|               | Olink INFLAMMATION(v.3021 FGF-23     | Q9GZV9     |       | OID00507       |                       |       |
|               | Olink INFLAMMATION(v.3021 FGF-5      | P12034     |       | OID00509       |                       |       |
|               | Olink INFLAMMATION(v.3021 Flt3L      | P49771     |       | OID00533       |                       |       |
|               | Olink INFLAMMATION(v.3021 GDNF       | P39905     |       | OID00475       |                       |       |
|               | Olink INFLAMMATION(v.3021 HGF        | P14210     |       | OID00522       |                       |       |
|               | Olink INFLAMMATION(v.3021 IFN-gamma  | P01579     |       | OID05547       |                       |       |
|               | Olink INFLAMMATION(v.3021 IL-1 alpha | P01583     |       | OID00493       |                       |       |
|               | Olink INFLAMMATION(v.3021 IL10       | P22301     |       | OID00528       |                       |       |
|               | Olink INFLAMMATION(v.3021 IL-10RA    | Q13651     |       | OID00508       |                       |       |

|                                          |        |          |
|------------------------------------------|--------|----------|
| Olink INFLAMMATION(v.3021 IL-10RB        | Q08334 | OID00515 |
| Olink INFLAMMATION(v.3021 IL-12B         | P29460 | OID00523 |
| Olink INFLAMMATION(v.3021 IL13           | P35225 | OID00525 |
| Olink INFLAMMATION(v.3021 IL-15RA        | Q13261 | OID00514 |
| Olink INFLAMMATION(v.3021 IL-17A         | Q16552 | OID00485 |
| Olink INFLAMMATION(v.3021 IL-17C         | Q9P0M4 | OID00483 |
| Olink INFLAMMATION(v.3021 IL18           | Q14116 | OID00501 |
| Olink INFLAMMATION(v.3021 IL-18R1        | Q13478 | OID00517 |
| Olink INFLAMMATION(v.3021 IL2            | P60568 | OID00495 |
| Olink INFLAMMATION(v.3021 IL-20          | Q9NYY1 | OID00537 |
| Olink INFLAMMATION(v.3021 IL-20RA        | Q9UHF4 | OID00489 |
| Olink INFLAMMATION(v.3021 IL-22 RA1      | Q8N6P7 | OID00516 |
| Olink INFLAMMATION(v.3021 IL-24          | Q13007 | OID00524 |
| Olink INFLAMMATION(v.3021 IL-2RB         | P14784 | OID00492 |
| Olink INFLAMMATION(v.3021 IL33           | O95760 | OID00543 |
| Olink INFLAMMATION(v.3021 IL4            | P05112 | OID00546 |
| Olink INFLAMMATION(v.3021 IL5            | P05113 | OID00559 |
| Olink INFLAMMATION(v.3021 IL6            | P05231 | OID00482 |
| Olink INFLAMMATION(v.3021 IL7            | P13232 | OID00478 |
| Olink INFLAMMATION(v.3021 IL8            | P10145 | OID00471 |
| Olink INFLAMMATION(v.3021 LAP TGF-beta-1 | P01137 | OID00480 |
| Olink INFLAMMATION(v.3021 LIF            | P15018 | OID00547 |
| Olink INFLAMMATION(v.3021 LIF-R          | P42702 | OID00511 |
| Olink INFLAMMATION(v.3021 MCP-1          | P13500 | OID00484 |
| Olink INFLAMMATION(v.3021 MCP-2          | P80075 | OID00549 |
| Olink INFLAMMATION(v.3021 MCP-3          | P80098 | OID00474 |
| Olink INFLAMMATION(v.3021 MCP-4          | Q99616 | OID00504 |
| Olink INFLAMMATION(v.3021 MMP-1          | P03956 | OID00510 |
| Olink INFLAMMATION(v.3021 MMP-10         | P09238 | OID00527 |
| Olink INFLAMMATION(v.3021 NRTN           | Q99748 | OID00548 |
| Olink INFLAMMATION(v.3021 NT-3           | P20783 | OID00554 |
| Olink INFLAMMATION(v.3021 OPG            | O00300 | OID00479 |
| Olink INFLAMMATION(v.3021 OSM            | P13725 | OID00494 |
| Olink INFLAMMATION(v.3021 PD-L1          | Q9NZQ7 | OID00518 |
| Olink INFLAMMATION(v.3021 SCF            | P21583 | OID00500 |
| Olink INFLAMMATION(v.3021 SIRT2          | Q8IXJ6 | OID00538 |
| Olink INFLAMMATION(v.3021 SLAMF1         | Q13291 | OID00502 |
| Olink INFLAMMATION(v.3021 ST1A1          | P50225 | OID00557 |
| Olink INFLAMMATION(v.3021 STAMBP         | O95630 | OID00558 |
| Olink INFLAMMATION(v.3021 TGF-alpha      | P01135 | OID00503 |
| Olink INFLAMMATION(v.3021 TNF            | P01375 | OID05548 |
| Olink INFLAMMATION(v.3021 TNFB           | P01374 | OID00561 |
| Olink INFLAMMATION(v.3021 TNFRSF9        | Q07011 | OID00553 |
| Olink INFLAMMATION(v.3021 TNFSF14        | O43557 | OID00506 |
| Olink INFLAMMATION(v.3021 TRAIL          | P50591 | OID00488 |
| Olink INFLAMMATION(v.3021 TRANCE         | O14788 | OID00521 |
| Olink INFLAMMATION(v.3021 TSLP           | Q969D9 | OID00497 |



|                                 |        |          |
|---------------------------------|--------|----------|
| Olink INFLAMMATION(v.3021 TWEAK | O43508 | OID00555 |
| Olink INFLAMMATION(v.3021 uPA   | P00749 | OID00481 |
| Olink INFLAMMATION(v.3021 VEGFA | P15692 | OID00472 |

## 8. *References.*

1. Amundadottir L, Kraft P, Stolzenberg-Solomon RZ, *et al.* Genome-wide association study identifies variants in the ABO locus associated with susceptibility to pancreatic cancer. *Nat Genet*, 2009. 41(9): p. 986-90.
2. Wolpin BM, Rizzato C, Kraft P, *et al.* Genome-wide association study identifies multiple susceptibility loci for pancreatic cancer. *Nat Genet*, 2014. 46(9): p. 994-1000.
3. Childs EJ, Mocci E, Campa D, *et al.* Common variation at 2p13.3, 3q29, 7p13 and 17q25.1 associated with susceptibility to pancreatic cancer. *Nat Genet*, 2015. 47(8): p. 911-6.
4. Petersen GM, Amundadottir L, Fuchs CS, *et al.* A genome-wide association study identifies pancreatic cancer susceptibility loci on chromosomes 13q22.1, 1q32.1 and 5p15.33. *Nat Genet*, 2010. 42(3): p. 224-8.
5. Campa D, Rizzato C, Capurso G, *et al.* Genetic susceptibility to pancreatic cancer and its functional characterisation: the PANcreatic Disease ReseArch (PANDoRA) consortium. *Dig Liver Dis*, 2013. 45(2): p. 95-9.
6. Slimani N, Kaaks R, Ferrari P, *et al.* European Prospective Investigation into Cancer and Nutrition (EPIC) calibration study: rationale, design and population characteristics. *Public Health Nutr*, 2002. 5(6B): p. 1125-45.
7. Riboli E, Hunt KJ, Slimani N, *et al.* European Prospective Investigation into Cancer and Nutrition (EPIC): study populations and data collection. *Public Health Nutr*, 2002. 5(6B): p. 1113-24.
8. Low M, Stegmaier C, Ziegler H, *et al.* [Epidemiological investigations of the chances of preventing, recognizing early and optimally treating chronic diseases in an elderly population (ESTHER study)]. *Dtsch Med Wochenschr*, 2004. 129(49): p. 2643-7.
